# Supplementary material for: Application of 3D mullite fiber matrix as a lithiophilic interlayer in lithium metal anodes
Source: Royal Society of Chemistry journal article supplement (doi:10.1039/d1dt03630k), 2022-01-01
Supplement: d1dt03630k1.pdf [file d1dt03630k1.pdf]

## Application of 3D Mullite Fiber Matrix as a Lithiophilic Interlayer in Lithium Metal Anode

Jinxin Fan, Yuan Tian, Cheng Wang\*

*Institute for New Energy Materials and Low-Carbon Technologies, School of Materials Science and Engineering, Tianjin University of Technology, Tianjin 300384, China*

Corresponding author

*E-mail address: cwang@tjut.edu.cn*

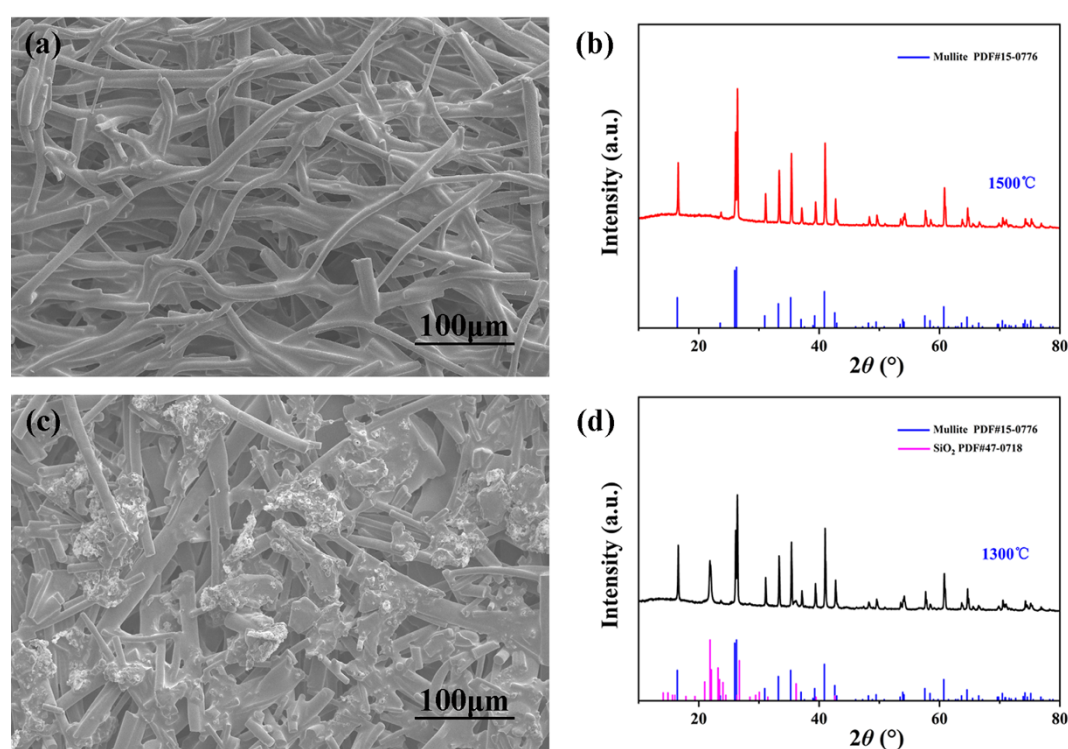

**Figure S1.** SEM images and XRD patterns of 3D mullite fiber sheet sintering at 1500°C (a, b) and 1300°C (c,d).

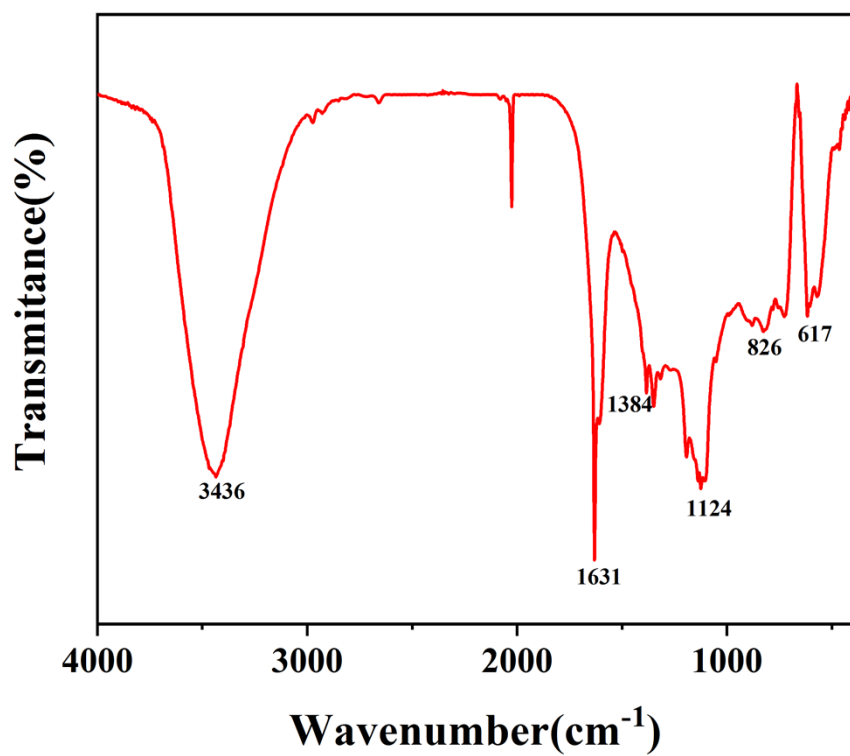

**Figure S2.** FTIR spectrum of mullite fiber sheet.

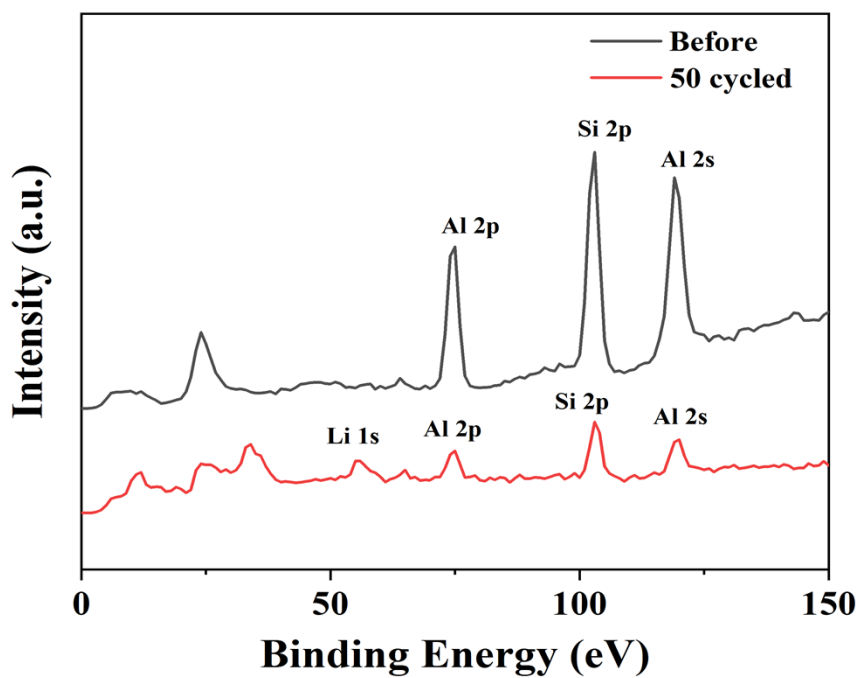

**Figure S3.** XPS survey spectrum of the 3D mullite fiber sheet.

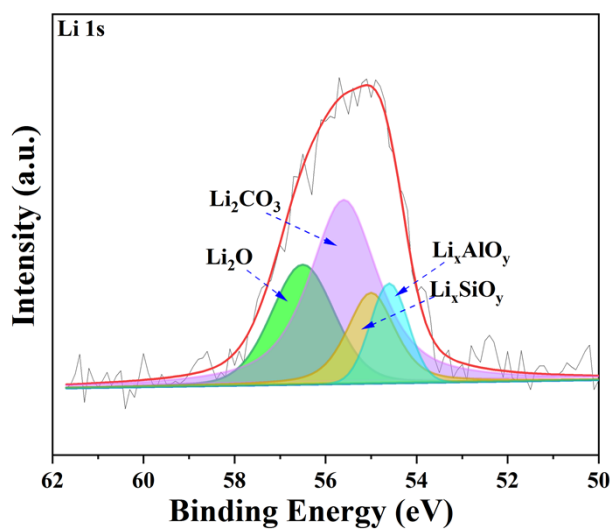

**Figure S4.** High-resolution XPS spectra of Li 1s for 3D mullite fiber sheet after 50 cycles.

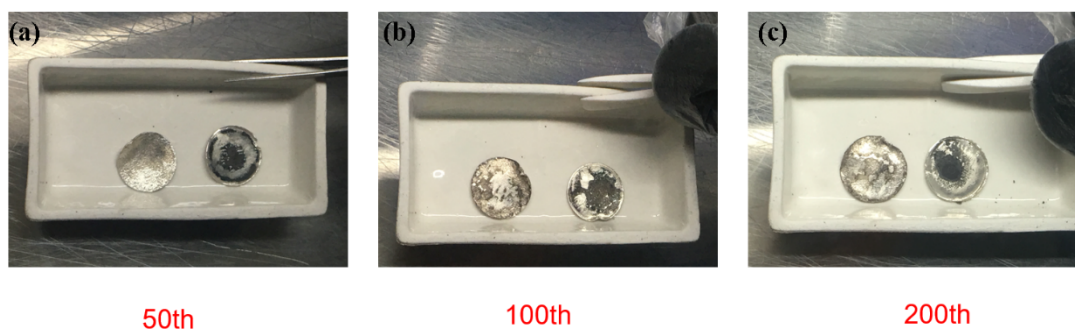

**Figure S5.** Optical observation of mullite fibers/Li composite electrode (left) and bare Li electrode (right) surface appearance at a current density of  $1.0 \text{ mA}\cdot\text{cm}^{-2}$  with  $0.5 \text{ mAh}\cdot\text{cm}^{-2}$  after different cycles, 50th (a), 100th (b), 200th (c).

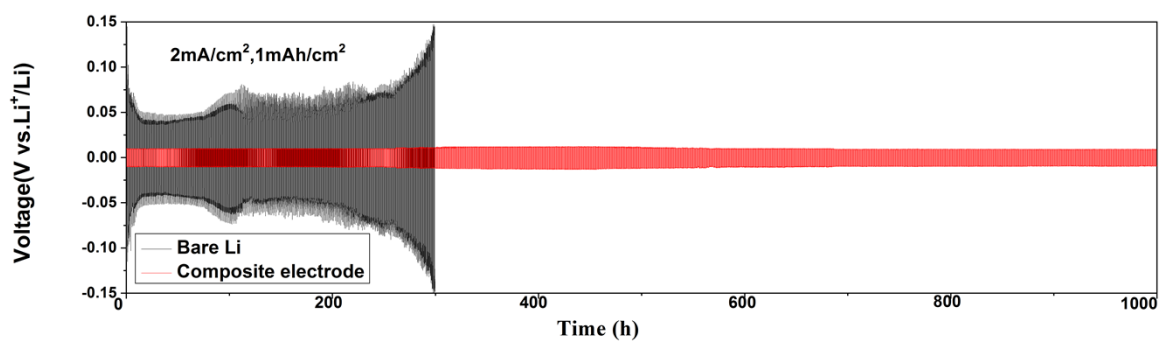

**Figure S6.** Comparisons of cycling performance between bare Li and mullite fibers/Li

composite electrode symmetric cells at a current density of  $2.0 \text{ mA}\cdot\text{cm}^{-2}$  with  $1 \text{ mAh}\cdot\text{cm}^{-2}$ .
